# Supplementary material for: Management of Mental Health Crises Among Youths With and Without ASD: A National Survey of Child Psychiatrists
Source: Atypon-hosted journal article supplement (doi:10.1176/appi.ps.201600332), 2017-06-01
Supplement: appi.ps.201600332.ds001.pdf [file appi.ps.201600332.ds001.pdf]

## Appendix (online-only), Figure 1: Mental Health Crisis Psychiatrist Survey

Directions: “Children with [ASD || acute psychiatric symptoms] may be at increased risk for experiencing a mental health crisis. A mental health crisis is defined as an acute disturbance of thought, mood, or behavior (e.g., self-injury, aggression, suicide, severe depression) that requires immediate intervention and the resources available to understand and deal with the situation are not available at the time and place of the occurrence. Please answer the following in terms of the resources available to you when managing a child [with ASD] experiencing a mental health crisis.

1. I have access to other mental health professionals (psychiatrists, psychologists, social workers) in the community to consult with if my patient [with ASD] has a history of mental health crisis.
2. I have access to a psychiatric crisis evaluation center that can facilitate a direct psychiatric inpatient hospital admission for a child [with ASD] who is experiencing a mental health crisis.
3. When my patient [with ASD] is experiencing a mental health crisis, I recommend the parent to immediately take their child to a nearby hospital emergency department for evaluation.
4. I routinely keep several appointments open during the week in-case a patient requires a same day appointment for immediate concerns, such as experiencing a mental health crisis
5. I proactively work with caregivers to form an emergency plan that they can implement if their child [with ASD] has a history of experiencing a mental health crisis
6. I will accept new patients [with ASD] who have a history of mental health crisis
7. My office is designed to manage a child [with ASD] who is experiencing a mental health crisis
8. I feel comfortable treating a child [with ASD] experiencing a mental health crisis in my outpatient practice.
9. I am confident that when emergency responders (e.g., 911, police) are called to manage a child [with ASD] who is experiencing a mental health crisis, they will do so in a safe and developmentally appropriate manner
10. I am confident that hospital emergency department staff and clinician(s) can manage a child [with ASD] who is experiencing a mental health crisis in a safe and developmentally appropriate manner.

\*\* The 5-point Likert response options for items 1-6 ranged from “Never” to “Always” and items 7-10 ranged from “Strongly Disagree” to “Agree”

Appendix (online-only), Figure 2: Flow diagram of the randomized incentive design and response rates.

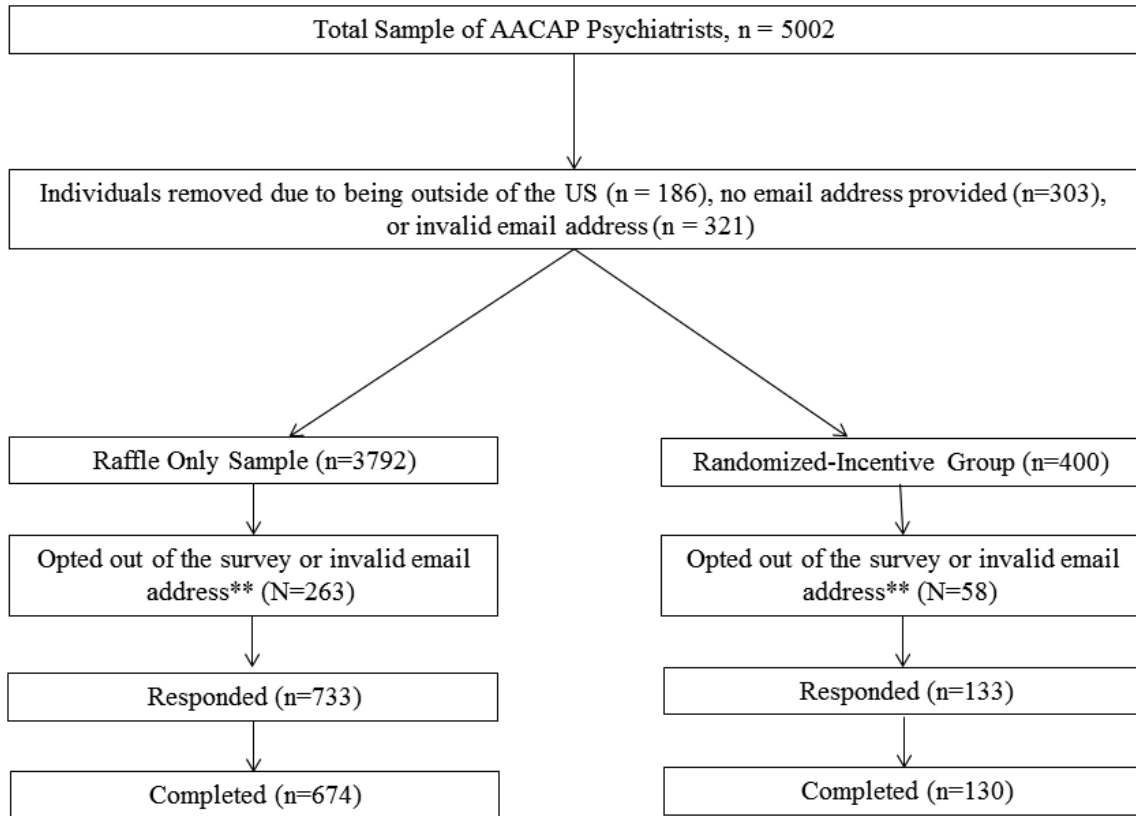

\*\*Emails were identified as “invalid” using proprietary email validation software. However, this process was not 100% accurate, resulting in several emails addresses continuing to be “invalid” when the survey link was administered.

**Appendix (online-only), Table 1: Differences between the randomized encouragement and non-randomized study arms**

|                                            | Non-Randomized Sample<br>(N = 733) | Randomized Encouragement Sample<br>(N = 133) | Test Statistic<br>( $\chi^2$ ) | p-value | df |
|--------------------------------------------|------------------------------------|----------------------------------------------|--------------------------------|---------|----|
| <i>% outpatient population with ASD, %</i> |                                    |                                              | 2.70                           | .61     | 4  |
| 0%                                         | 7                                  | 5                                            |                                |         |    |
| 1-5%                                       | 36                                 | 40                                           |                                |         |    |
| 6-15%                                      | 38                                 | 40                                           |                                |         |    |
| 16-30%                                     | 12                                 | 9                                            |                                |         |    |
| $\geq 30\%$                                | 7                                  | 7                                            |                                |         |    |
| <i>Region</i>                              |                                    |                                              | 8.97                           | .25     | 7  |
| North East                                 | 12                                 | 13                                           |                                |         |    |
| New York and New Jersey                    | 13                                 | 22                                           |                                |         |    |
| Mid Atlantic                               | 16                                 | 12                                           |                                |         |    |
| South East                                 | 14                                 | 10                                           |                                |         |    |
| North Central                              | 16                                 | 16                                           |                                |         |    |
| South West                                 | 11                                 | 9                                            |                                |         |    |
| Mid-West                                   | 8                                  | 8                                            |                                |         |    |
| California                                 | 11                                 | 9                                            |                                |         |    |
| <i>Psychiatrist race</i>                   |                                    |                                              | 4.60                           | .10     | 2  |
| Non-White                                  | 18                                 | 27                                           |                                |         |    |
| White                                      | 76                                 | 68                                           |                                |         |    |
| Prefer not to report                       | 5                                  | 5                                            |                                |         |    |
| <i>Psychiatrist ethnicity</i>              |                                    |                                              | .70                            | .72     | 2  |
| Hispanic                                   | 6                                  | 5                                            |                                |         |    |
| Non-Hispanic                               | 87                                 | 88                                           |                                |         |    |
| Prefer not to report                       | 7                                  | 7                                            |                                |         |    |
| <i>Years experience</i>                    |                                    |                                              | .81                            | .70     | 2  |
| 0-10                                       | 35                                 | 33                                           |                                |         |    |
| 11-25                                      | 35                                 | 39                                           |                                |         |    |
| $\geq 26$                                  | 30                                 | 28                                           |                                |         |    |

|                                                                 |    |    |      |     |   |
|-----------------------------------------------------------------|----|----|------|-----|---|
| <i>Age, in years</i>                                            |    |    | 3.31 | .34 | 3 |
| 25-40                                                           | 27 | 29 |      |     |   |
| 41-50                                                           | 20 | 21 |      |     |   |
| 51-60                                                           | 25 | 29 |      |     |   |
| ≥61                                                             | 28 | 21 |      |     |   |
| <i>Primary activity</i>                                         |    |    | .30  | .60 | 1 |
| Patient Care                                                    | 87 | 89 |      |     |   |
| Other                                                           | 13 | 11 |      |     |   |
| <i>Sees adults</i>                                              |    |    | .30  | .58 | 1 |
| No                                                              | 15 | 17 |      |     |   |
| Yes                                                             | 85 | 83 |      |     |   |
| <i>Proportion of time spent in an <u>inpatient</u> Setting</i>  |    |    | 2.42 | .30 | 2 |
| 0-9%                                                            | 67 | 62 |      |     |   |
| 10-24%                                                          | 16 | 15 |      |     |   |
| ≥25%                                                            | 18 | 23 |      |     |   |
| <i>Proportion of time spent in an <u>outpatient</u> Setting</i> |    |    | .09  | .76 | 1 |
| 100%                                                            | 64 | 62 |      |     |   |
| <100%                                                           | 36 | 38 |      |     |   |
| <i>% of appointments that are evaluations</i>                   |    |    | 3.27 | .19 | 2 |
| 0-10%                                                           | 56 | 48 |      |     |   |
| 11-15%                                                          | 24 | 31 |      |     |   |
| ≥16%                                                            | 20 | 21 |      |     |   |
| <i>Number of outpatients seen per month</i>                     |    |    | .19  | .91 | 2 |
| 0-99                                                            | 35 | 35 |      |     |   |
| 100-199                                                         | 38 | 40 |      |     |   |
| ≥200                                                            | 27 | 26 |      |     |   |
| <i>Works in a teaching hospital</i>                             |    |    | .14  | .71 | 1 |
| No                                                              | 60 | 58 |      |     |   |
| Yes                                                             | 40 | 32 |      |     |   |
| <i>Wait time for appointment</i>                                |    |    | .04  | .98 | 2 |

|                               |    |    |      |     |   |
|-------------------------------|----|----|------|-----|---|
| <1 month                      | 42 | 42 |      |     |   |
| >1-3 months                   | 46 | 47 |      |     |   |
| $\geq$ 4 months               | 11 | 11 |      |     |   |
| <i>Access to Telemedicine</i> |    |    | 1.07 | .30 | 1 |
| No                            | 72 | 77 |      |     |   |
| Yes                           | 28 | 24 |      |     |   |

**Appendix (online-only), Table 2: Standardized Mean Differences (SMD) between Groups Before and After Applying the Stabilized and Combined Inverse Probability Weights**

| Variable                                                 | Unweighted                                             |                                                     |      | Weighted                                                |                                                     |      |
|----------------------------------------------------------|--------------------------------------------------------|-----------------------------------------------------|------|---------------------------------------------------------|-----------------------------------------------------|------|
|                                                          | Psychiatrists Reporting on Youth without ASD (N = 374) | Psychiatrists Reporting on Youth with ASD (N = 492) | SMD  | Psychiatrists Reporting on Youth without ASD (N = 374 ) | Psychiatrists Reporting on Youth with ASD (N = 492) | SMD  |
| <i>Region</i>                                            | 24.66                                                  | 25.13                                               | .06  | 24.87                                                   | 24.87                                               | <.01 |
| <i>Psychiatrist race</i>                                 | .83                                                    | .88                                                 | .11  | .85                                                     | .85                                                 | <.01 |
| <i>Psychiatrist ethnicity</i>                            | 1.01                                                   | 1.00                                                | .02  | 1.02                                                    | 1.02                                                | <.01 |
| <i>Age, in years</i>                                     | 1.63                                                   | 1.45                                                | .15  | 1.45                                                    | 1.45                                                | <.01 |
| <i>Years of experience</i>                               | .99                                                    | .91                                                 | .09  | .88                                                     | .88                                                 | <.01 |
| <i>Primary activity</i>                                  | .12                                                    | .13                                                 | .04  | .11                                                     | .11                                                 | <.01 |
| <i>Sees adults</i>                                       | .86                                                    | .83                                                 | .09  | .85                                                     | .85                                                 | <.01 |
| <i>Proportion of time spent in an inpatient setting</i>  | .52                                                    | .52                                                 | <.01 | .49                                                     | .49                                                 | <.01 |
| <i>Proportion of time spent in an outpatient setting</i> | .37                                                    | .36                                                 | <.01 | .34                                                     | .34                                                 | <.01 |
| <i>% of appointments that are new evaluations</i>        | .59                                                    | .71                                                 | .15  | .67                                                     | .67                                                 | <.01 |
| <i>Number of outpatients per month</i>                   | .77                                                    | 1.02                                                | .30  | .94                                                     | .94                                                 | <.01 |
| <i>Works in a teaching hospital</i>                      | .37                                                    | .43                                                 | .10  | .39                                                     | .39                                                 | <.01 |
| <i>Wait time for appointment</i>                         | .54                                                    | .80                                                 | .38  | .69                                                     | .69                                                 | <.01 |
| <i>Access to telemedicine</i>                            | .30                                                    | .25                                                 | .13  | .28                                                     | .28                                                 | <.01 |

\*See Table 1 for response categories for each variable
